# Supplementary material
Source: ML conference proceedings conference paper supplement (https://openaccess.thecvf.com/content/CVPR2026/html/Yang_H2-Surv_Hierarchical_Hyperbolic_CVPR_2026_paper.html)
Supplement: Supplementary file 1 [file Yang_H2-Surv_Hierarchical_Hyperbolic_CVPR_2026_supplemental.pdf]

# H<sup>2</sup>-Surv: Hierarchical Hyperbolic Multimodal Learning for Survival Prediction

## Supplementary Material

### 1. Rationale

#### 1.1. Ablation experiments on hyperparameters.

In this section, we conducted ablation experiments on hyperparameters  $\lambda$ ,  $\beta$ , focusing on the effects of the regularization loss  $\mathcal{L}_{\text{Hd}}$ ,  $\mathcal{L}_{\text{Hyent}}$  and  $\mathcal{L}_{\text{ordinal}}$ . We used the concordance index (C-index) as the evaluation metric, and the specific results across five TCGA datasets (BRCA, BLCA, UCEC, LUAD, GBMLGG) are summarized in Table 1.

As shown in the table, we observe that small values of  $\lambda$  (e.g., 0.001) result in under-regularization and suboptimal performance across all datasets. Increasing  $\lambda$  gradually improves performance, and the best overall results are achieved when  $\lambda = 0.01$ ,  $\beta = 0.1$ . Under this setting, our model obtains the highest C-index across all datasets: 0.763 (BRCA), 0.701 (BLCA), 0.760 (UCEC), 0.700 (LUAD), and 0.859 (GBMLGG). This configuration balances the contribution of survival ranking constraints and censoring information, enhancing the model’s ability to learn robust representations.

We also observe performance degradation when  $\lambda$  becomes too large (e.g.,  $\lambda = 0.5$ ), likely due to over-penalization from regularization terms that dominate the optimization. Therefore, we selected  $\lambda = 0.01$ ,  $\beta = 0.1$  as the optimal hyperparameter combination for all subsequent experiments.

Table 1. Ablation study of hyperparameters  $\lambda$ ,  $\beta$  on C-index across datasets.

| $\lambda$   | $\beta$    | BRCA  | BLCA  | UCEC  | LUAD  | GBM   |
|-------------|------------|-------|-------|-------|-------|-------|
| 0.001       | 0.01       | 0.640 | 0.618 | 0.568 | 0.598 | 0.609 |
| 0.005       | 0.05       | 0.669 | 0.670 | 0.669 | 0.626 | 0.741 |
| <b>0.01</b> | <b>0.1</b> | 0.763 | 0.701 | 0.760 | 0.700 | 0.859 |
| 0.05        | 0.1        | 0.749 | 0.699 | 0.701 | 0.691 | 0.824 |
| 0.1         | 0.5        | 0.662 | 0.690 | 0.656 | 0.624 | 0.690 |
| 0.5         | 0.8        | 0.649 | 0.611 | 0.599 | 0.601 | 0.630 |

#### 1.2. T-test Analysis.

The T-test is a statistical analysis method used to determine if there is a significant difference between the means of two groups. In the T-test analysis, the t-value quantifies the size of the difference relative to the variability within two groups, while the p-value is the probability that the results from our results occurred by chance. As the results shown in Fig. 1, our framework can distinguish between different groups with good p-values and t-values, especially on BLCA, and UCEC datasets.

Besides, we report the p-values of pairwise log-rank tests across five TCGA datasets (BLCA, BRCA, GBMLGG, LUAD, and UCEC) to evaluate the statistical significance of survival curve separability achieved by different methods. As shown in Table 2, our proposed method consistently yields significantly lower p-values compared to existing baselines, indicating stronger survival stratification capability. Particularly, our method achieves the lowest p-value on BLCA ( $3.2e^{-15}$ ), GBMLGG ( $1.4e^{-43}$ ), and LUAD ( $8.2e^{-22}$ ), and highly competitive results on the remaining datasets. These results confirm the robustness and effectiveness of our model in capturing prognostic signals across diverse cancer types.

Table 2. P-values of pairwise significance tests (log-rank test) across five TCGA datasets. Lower is better.

| Methods  | BLCA                           | BRCA                          | GBMLGG                         | LUAD                           | UCEC                           |
|----------|--------------------------------|-------------------------------|--------------------------------|--------------------------------|--------------------------------|
| SNN      | $1.7e^{-6}$                    | $1.5e^{-2}$                   | $1.1e^{-27}$                   | $1.1e^{-3}$                    | $9.8e^{-4}$                    |
| TransMIL | $5.6e^{-2}$                    | $2.4e^{-3}$                   | $2.5e^{-25}$                   | $3.8e^{-2}$                    | $9.8e^{-2}$                    |
| MCAT     | $7.8e^{-6}$                    | $7.5e^{-3}$                   | $1.6e^{-19}$                   | $6.9e^{-5}$                    | $4.8e^{-3}$                    |
| SurvPath | $8.2e^{-6}$                    | $1.4e^{-3}$                   | $1.0e^{-29}$                   | $2.2e^{-4}$                    | $1.4e^{-5}$                    |
| MOTCat   | $2.9e^{-7}$                    | $4.9e^{-4}$                   | $3.4e^{-30}$                   | $1.1e^{-5}$                    | $3.8e^{-7}$                    |
| CMTA     | $2.0e^{-8}$                    | $3.1e^{-3}$                   | $1.8e^{-33}$                   | $9.6e^{-7}$                    | $1.7e^{-3}$                    |
| CGM      | $5.7e^{-11}$                   | $2.2e^{-7}$                   | $9.8e^{-32}$                   | $1.1e^{-4}$                    | $3.6e^{-4}$                    |
| Ours     | <b><math>3.2e^{-15}</math></b> | <b><math>1.5e^{-5}</math></b> | <b><math>1.4e^{-43}</math></b> | <b><math>8.2e^{-22}</math></b> | <b><math>3.9e^{-10}</math></b> |

#### 1.3. Efficiency comparison

Table 3 presents a comparison of our method with several existing multimodal survival prediction models in terms of GPU memory consumption (GB), training time, and inference time (in minutes). While models such as SurvPath and MCAT demonstrate low computational overhead, they sacrifice performance and lack fine-grained multimodal integration. In contrast to existing approaches, our method adopts a hyperbolic fusion strategy that enables more expressive modeling of multimodal interactions, particularly under hierarchical constraints. While this leads to moderately higher training resource requirements (GPU memory: 12.98 GB), the inference time remains comparable to MOTCat (10.34 vs. 38.35 min). Importantly, our method achieves significantly better predictive performance (see Section 4 of the original paper), demonstrating that the added training complexity translates into meaningful survival prediction gains—a favorable trade-off in clinical survival modeling scenarios where inference efficiency and accuracy are both critical.

Table 3. Efficiency comparison with baselines in terms of GPU memory (GB), training time, and test time (minutes).

| Methods    | GPU memory ↓ | Training time ↓ | Test time ↓ |
|------------|--------------|-----------------|-------------|
| MCAT [2]   | 4.06         | 13.78           | 9.69        |
| MOTCat [4] | 3.09         | 39.28           | 38.35       |
| CMTA [7]   | 19.70        | 33.17           | 28.14       |
| PIBD [6]   | 23.06        | 59.71           | 23.49       |
| Ours(ES)   | 12.56        | 34.22           | 11.85       |
| Ours(HS)   | 12.98        | 36.36           | 10.34       |

#### 069 1.4. Robustness to Missing Modalities.

070 Previous multimodal survival prediction methods typically  
 071 assume that all modalities are available during both train-  
 072 ing and inference. However, in real-world clinical settings,  
 073 multi-omics data are often incomplete due to technical lim-  
 074 itations or sample quality issues. To assess robustness un-  
 075 der missing-modality conditions, we simulate two levels of  
 076 modality absence—60% and 100%—by randomly mask-  
 077 ing either the WSI or genomic branch during inference.  
 078 As shown in Table 4, our model consistently achieves the  
 079 highest C-index values across all datasets and missing lev-  
 080 els. Under complete modality absence (100%), our ap-  
 081 proach outperforms DisPro (CVPR25) [5] by up to 0.047  
 082 on CPTAC-LUAD. Even under partial missing conditions  
 083 (60%), H<sup>2</sup>-Surv maintains clear advantages over all base-  
 084 lines, demonstrating strong resilience to modality dropout.  
 085 These improvements stem from the pathway-level bridge  
 086 and the TOCL module, which jointly enhance cross-modal  
 087 alignment and temporal survival ranking.

Table 4. C-index performance under missing-modality conditions on three cancer cohorts.  $\times$  is the missing modality, and  $\checkmark$  means the modality is available.

| Missing Rate | WSI          | Genomics     | Model           | TCGA-LUAD         | CPTAC-LUAD        |
|--------------|--------------|--------------|-----------------|-------------------|-------------------|
| 100%         | $\times$     | $\checkmark$ | SNNTrans        | 0.638 $\pm$ 0.022 | 0.602 $\pm$ 0.018 |
|              |              |              | DisPro (CVPR25) | 0.646 $\pm$ 0.038 | 0.634 $\pm$ 0.012 |
|              |              |              | <b>Ours</b>     | 0.676 $\pm$ 0.050 | 0.681 $\pm$ 0.031 |
| 100%         | $\checkmark$ | $\times$     | DFTD-MIL        | 0.647 $\pm$ 0.051 | 0.626 $\pm$ 0.019 |
|              |              |              | DisPro (CVPR25) | 0.639 $\pm$ 0.061 | 0.631 $\pm$ 0.014 |
|              |              |              | <b>Ours</b>     | 0.681 $\pm$ 0.057 | 0.690 $\pm$ 0.017 |
| 60%          | $\times$     | $\checkmark$ | DisPro (CVPR25) | 0.673 $\pm$ 0.013 | 0.664 $\pm$ 0.039 |
|              |              |              | <b>Ours</b>     | 0.684 $\pm$ 0.028 | 0.686 $\pm$ 0.010 |
|              |              |              | DisPro (CVPR25) | 0.668 $\pm$ 0.044 | 0.682 $\pm$ 0.028 |
| 60%          | $\checkmark$ | $\times$     | <b>Ours</b>     | 0.693 $\pm$ 0.036 | 0.693 $\pm$ 0.024 |

#### 088 1.5. Sensitivity to Curvature Hyperparameter

089 The curvature  $c$  is learned via a *softplus* transformation and  
 090 optimised using the same learning rate as the rest of the  
 091 network. This enables adaptive fitting to the data mani-  
 092 fold without manual tuning. To prevent geometric distortion  
 093 from extreme values, we apply optional bounds (e.g., min =  
 094  $1e^{-4}$ , max = 5.0), which are rarely triggered in practice as  
 095  $c$  consistently converges to moderate values. We also evalu-  
 096 ated the **sensitivity to curvature initialisation**. As shown  
 097 in the table below, the model remains robust across a wide

range of initial  $\hat{c}$  values, consistently converging to simi-  
 lar values of  $c$  and achieving stable validation performance.  
 This confirms that our adaptive strategy **provides reliable  
 geometry without the need for extensive tuning.**

Table 5. Effect of different initializations of  $\hat{c}_0$  on the final learned curvature  $c$  and C-index on BRCA.

| Initialization $\hat{c}_0$ | softplus( $\hat{c}_0$ ) | Final Learned $c$ | C-index on BRCA |
|----------------------------|-------------------------|-------------------|-----------------|
| 0.5                        | 0.97                    | 1.92              | 0.760           |
| 1.0                        | 1.31                    | 2.02              | 0.763           |
| 2.0                        | 2.13                    | 1.95              | 0.759           |
| 5.0                        | 5.01                    | 2.08              | 0.761           |

#### 1.6. Hyperbolic Embedding Visualization

To better understand the hyperbolic constraints and the re-  
 sulted embeddings, we employ HoroPCA [1] to visualize  
 the learned hyperbolic embeddings. Using the LUAD sur-  
 vival prediction task as an example, Fig. ?? displays fea-  
 tures across modalities and hierarchical levels. The visu-  
 alization reveals a clear hierarchical organization: patient-  
 level embeddings are concentrated near the origin, WSI-  
 and pathway-level embeddings lie at intermediate radii, and  
 gene- and patch-level embeddings are positioned closer to  
 the boundary of the Poincaré ball. Moreover, distinct de-  
 cision boundaries between risk groups indicate that our  
 method effectively aligns and distributes multimodal hier-  
 archical features in hyperbolic space. Such structured rep-  
 resentations provide a more faithful organization of cross-  
 modal information and contribute to improved performance  
 on multimodal survival prediction.

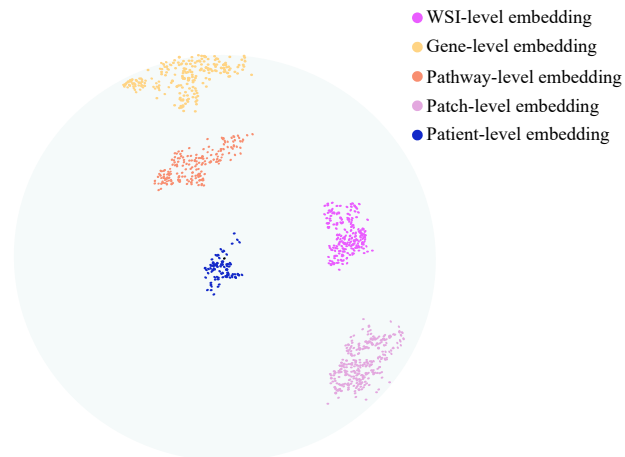

Figure 1. Distribution of key features in hyperbolic space.

#### 1.7. Qualitative Analysis of Model Interpretability

To qualitatively demonstrate the interpretability and  
 feature-level complementarity achieved through the fusion

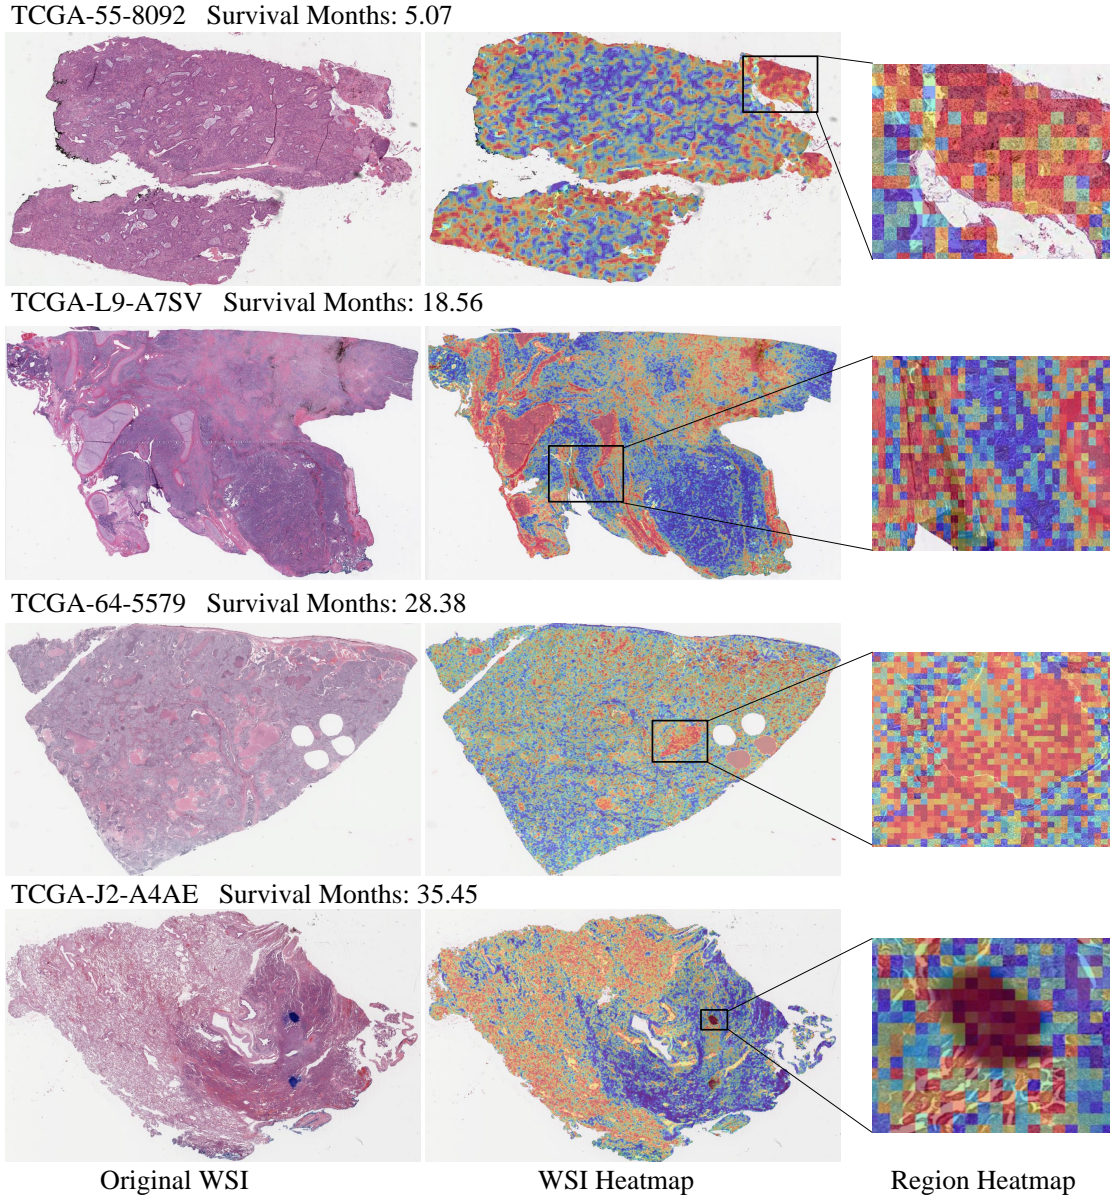

Figure 2. Pathological gene attention heatmap display on TCGA-LUAD dataset.

123 of histopathology and genomic modalities, we conducted  
 124 visual and attribution-based analyses to examine modality-  
 125 specific contributions to survival prediction. Fig. 2 illus-  
 126 trates the interpretability advantages of our  $H^2$ -Surv. For  
 127 example, in LUAD cohorts, attention-based heatmaps high-  
 128 light discriminative histopathological regions in high-risk  
 129 and low-risk patients. Representative patches are extracted  
 130 to illustrate morphological characteristics associated with  
 131 risk. In parallel, the Integrated Gradients (IG) method [3]  
 132 is applied to identify key genes with high attribution val-  
 133 ues, providing insight into molecular contributions to sur-  
 134 vival. All morphological and gene-level findings are re-  
 135 viewed and confirmed by expert pathologists, validating the

model’s ability to identify clinically meaningful biomarkers  
 across modalities. For example, in the LUAD cohort, case  
 TCGA-L9-A7SV shows dense cellular clustering and irreg-  
 ular gland formation in the heatmap, with top-ranked genes  
 such as HS3ST6 and FAM135B exhibiting strong positive  
 contributions, leading to a high-risk prediction consistent  
 with its poor survival outcome.

## References

- [1] Ines Chami, Albert Gu, Dung P Nguyen, and Christopher Ré. Horopca: Hyperbolic dimensionality reduction via horospherical projections. In *Proceedings of the 38th International*

- 147 *Conference on Machine Learning (ICML)*, pages 1419–1429.  
148 PMLR, 2021. 2
- 149 [2] Richard J Chen, Ming Y Lu, Wei-Hung Weng, Tiffany Y  
150 Chen, Drew FK Williamson, Trevor Manz, Maha Shady, and  
151 Faisal Mahmood. Multimodal co-attention transformer for  
152 survival prediction in gigapixel whole slide images. In *Pro-  
153 ceedings of the IEEE Int. Conf. Comput. Vis.*, pages 4015–  
154 4025, 2021. 2
- 155 [3] Mukund Sundararajan, Ankur Taly, and Qiqi Yan. Axiomatic  
156 attribution for deep networks. In *International conference on  
157 machine learning*, pages 3319–3328. PMLR, 2017. 3
- 158 [4] Yingxue Xu and Hao Chen. Multimodal optimal transport-  
159 based co-attention transformer with global structure consis-  
160 tency for survival prediction. In *Proceedings of the IEEE Int.  
161 Conf. Comput. Vis.*, pages 21241–21251, 2023. 2
- 162 [5] Yingxue Xu, Fengtao Zhou, Chenyu Zhao, Yihui Wang, Can  
163 Yang, and Hao Chen. Distilled prompt learning for incom-  
164 plete multimodal survival prediction. In *Proceedings of the  
165 Computer Vision and Pattern Recognition Conference*, pages  
166 5102–5111, 2025. 2
- 167 [6] Yilan Zhang, Yingxue Xu, Jianqi Chen, Fengying Xie, and  
168 Hao Chen. Prototypical information bottlenecking and dis-  
169 entangling for multimodal cancer survival prediction. *arXiv  
170 preprint arXiv:2401.01646*, 2024. 2
- 171 [7] Fengtao Zhou and Hao Chen. Cross-modal translation and  
172 alignment for survival analysis. In *Proceedings of the IEEE  
173 Int. Conf. Comput. Vis.*, pages 21485–21494, 2023. 2
